# Supplementary material for: Effects of nutritional state, aging and high chronic intake of sucrose on brain protein synthesis in rats: modulation of it by rutin and other micronutrients
Source: Royal Society of Chemistry journal article supplement (doi:10.1039/c7fo01953j), 2018-01-01

### Supplemental Figure 1: Evolution of body weight

See material and method for protocol description. ACt = adult control rats; OCt = old control rats; OCtS = old control rats supplemented with micronutrients; OTr = old sucrose treated rats; OTrS = old sucrose treated rats supplemented with macronutrients. \*: for this month, the only significant effect of variance analysis was age ( $P < 0.05$ ). #: for this month, the only significant effect of variance analysis was sucrose treatment. Values are means  $\pm$  SE.

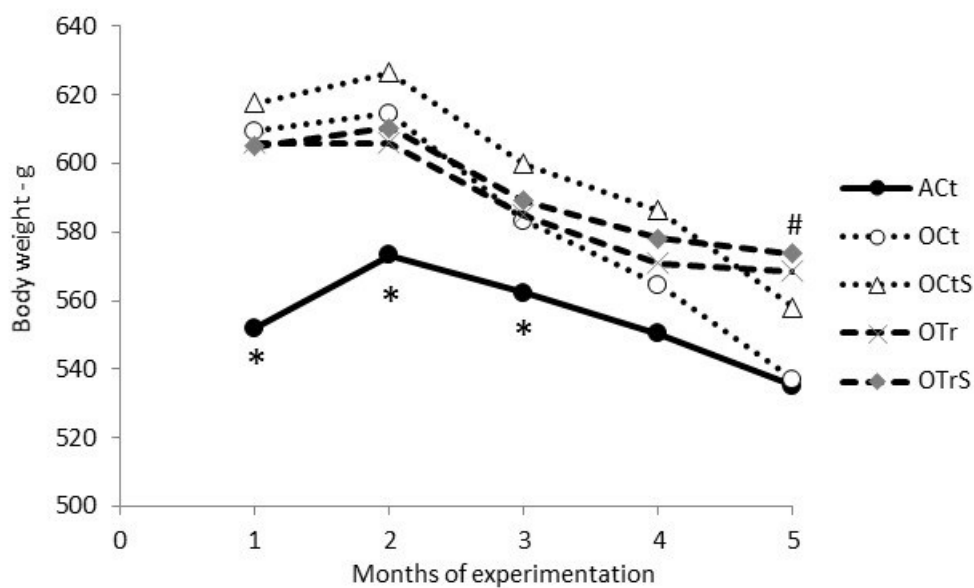

Supplement: c7fo01953j1.pdf [file c7fo01953j1.pdf]
